# Supplementary material
Source: MDPI journal article supplement (https://www.mdpi.com/2071-1050/14/6/3430)
Supplement: s1 [file s1]

## HARVEST MAP

50 KM

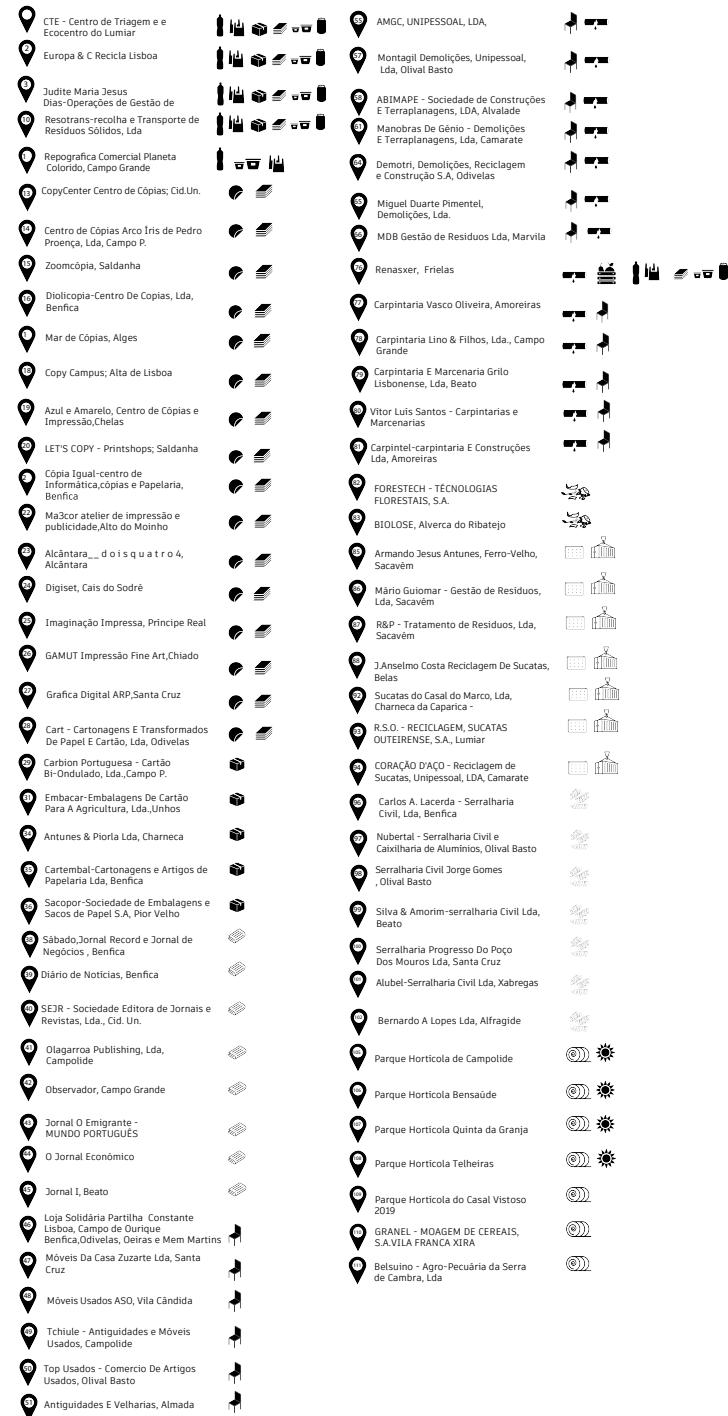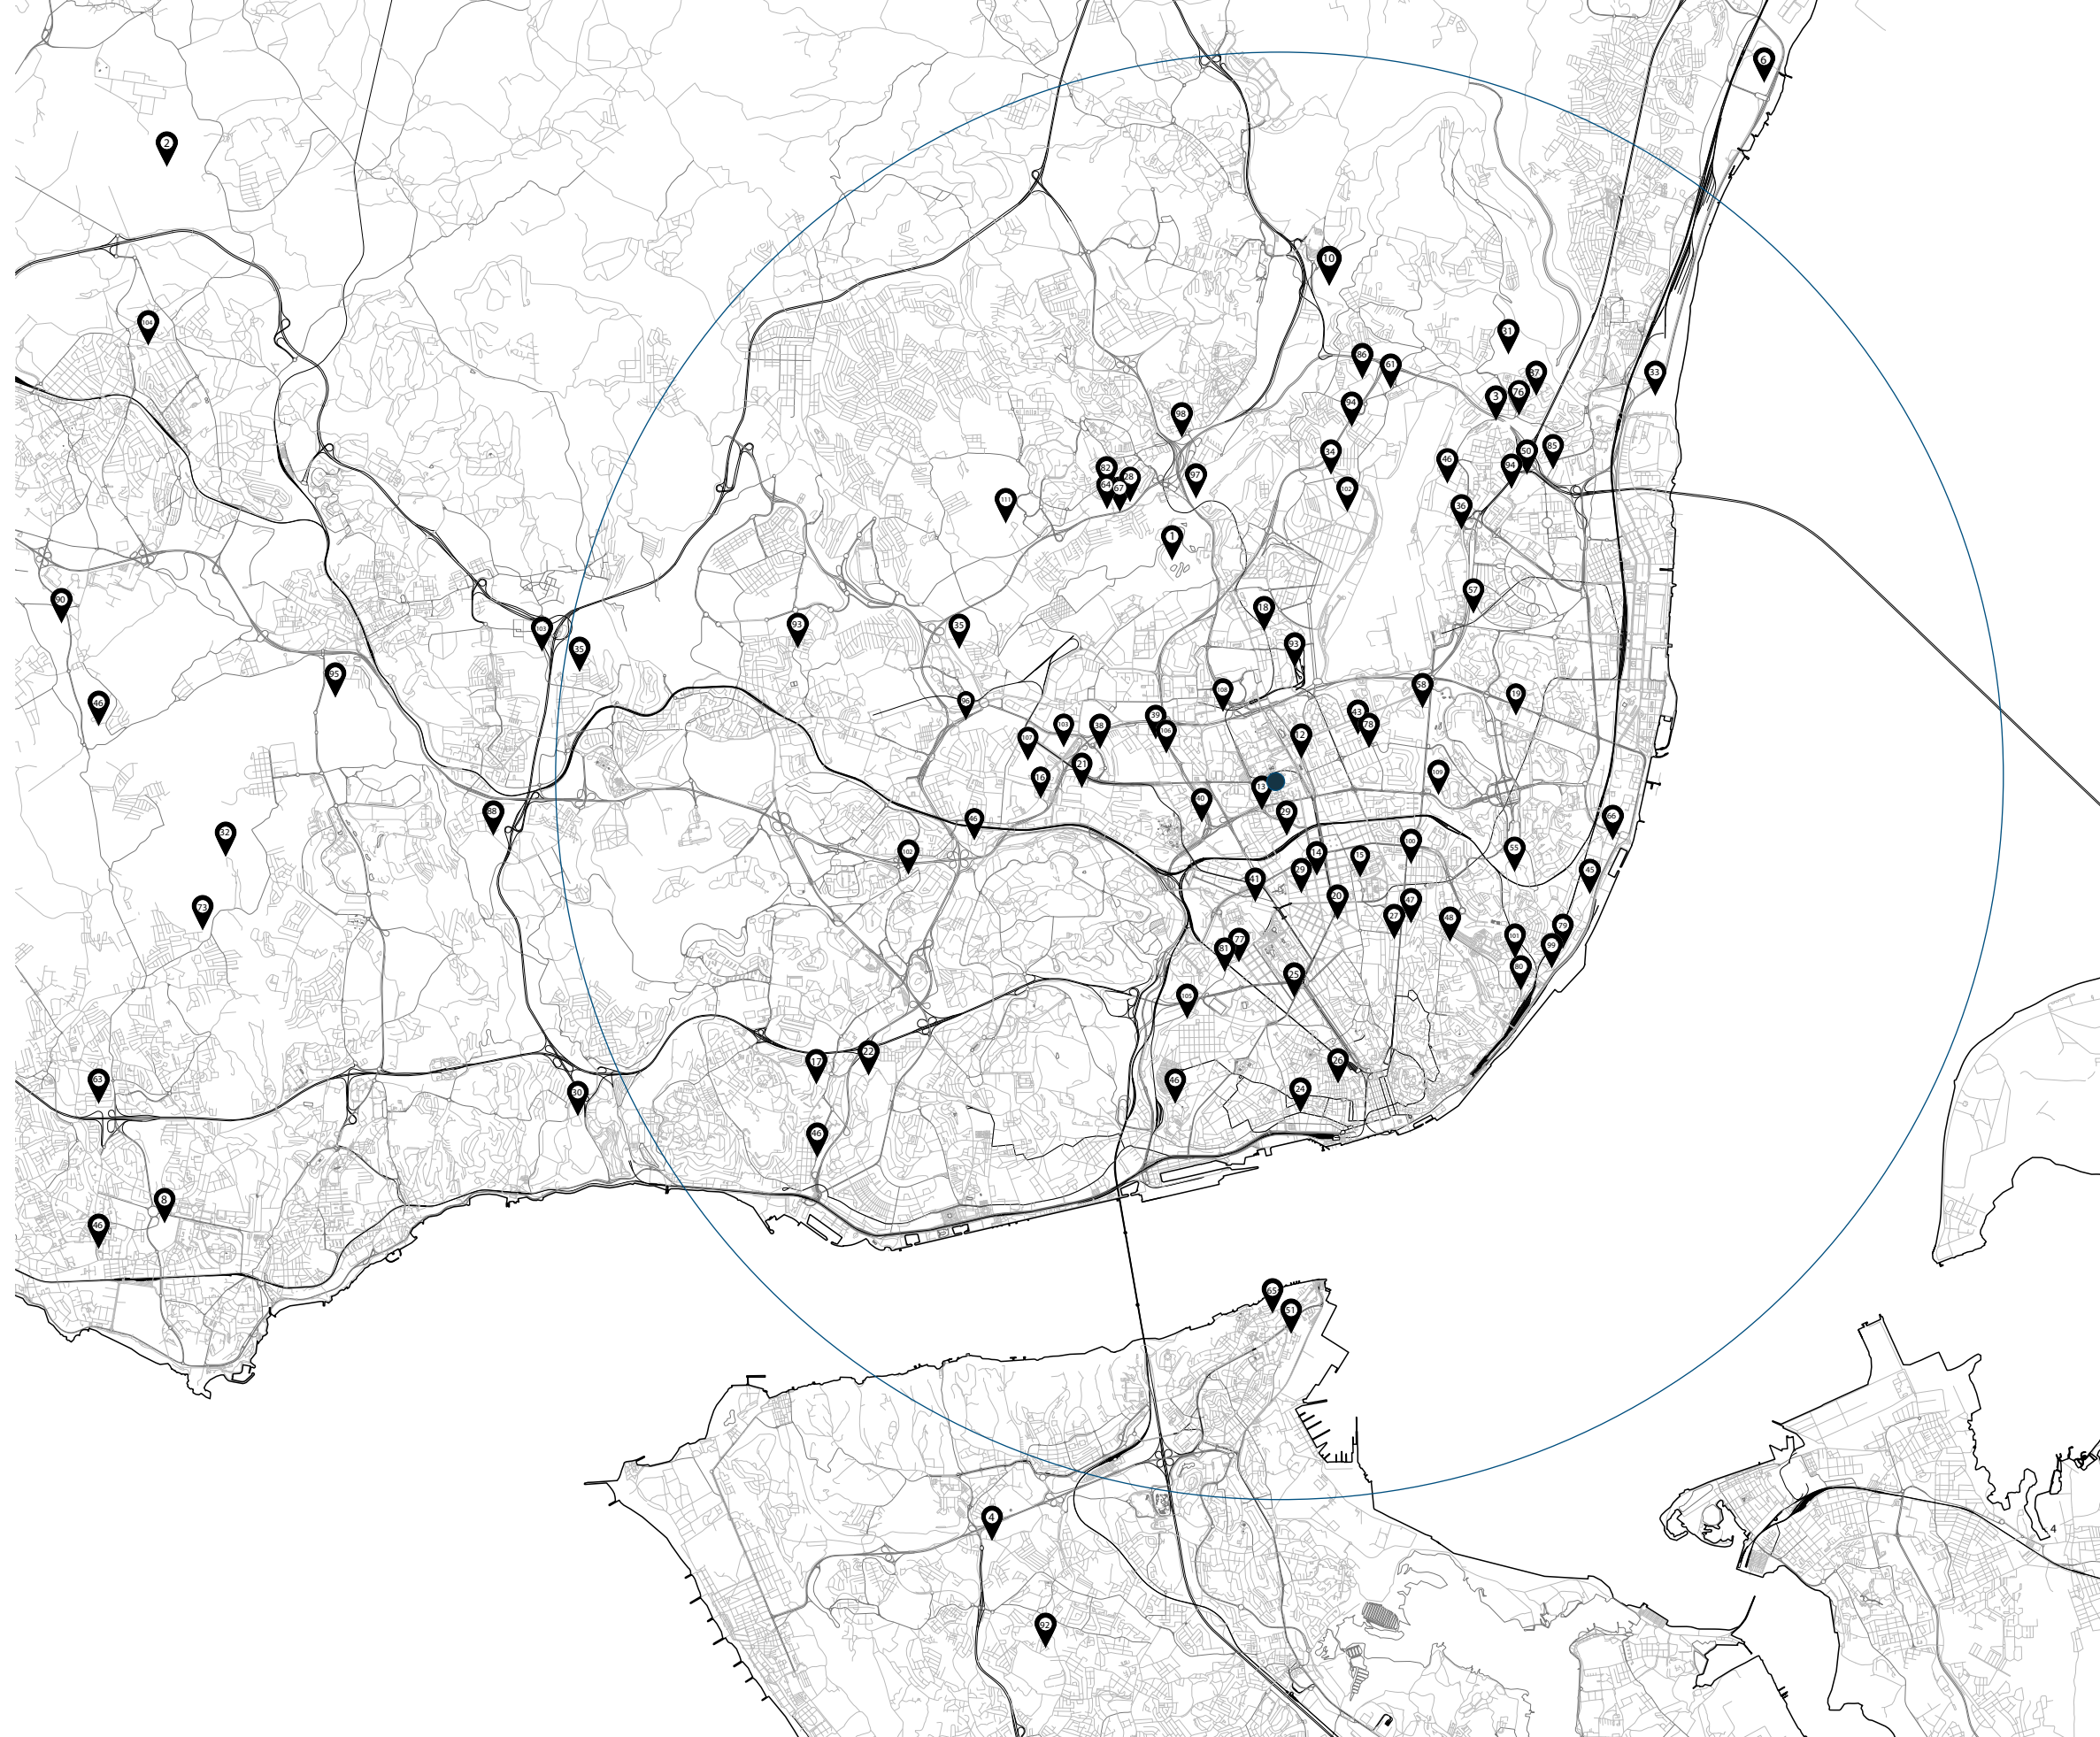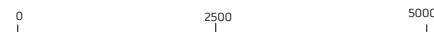



# A Methodology to qualitatively select upcycled building materials from urban and industrial waste

Sara Parece <sup>1\*</sup>, Vasco Rato <sup>1</sup>, Ricardo Resende <sup>1</sup> and Pedro Pinto <sup>2</sup>

## HARVEST MAP

40 KM

- Amarsul – Ecocentros e Ecoparques
- Stericycle Torres Vedras
- Resotrans-recolha e Transporte de Resíduos Sólidos, Lda
- MAQUISAVINHA - Aterros e Disaterros, LDA, Alenquer
- Ambigroup- Demolições, Resíduos e Reciclagem, Arranhô,Odivelas e Seixal
- Alberto & Alves - Industria Embalagens Do Carregado, Lda
- Marquesapal-comércio De Paletes e Produtos Recicladso Lda
- Antalves - Paletes E Embalagens De Madeira, Lda, Pêro Pinheiro
- AJ Manata Jardins, Sintra
- Rodrigo Manuel Soares & Filhos Lda, Arranhô -40km
- Serralharia Das Lopus Lda., Belas
- Farinhas Firmos, Moagem de Cereais, Lda, Colares

25 KM

- Europa & C Recicla Lisboa[ DS
- Amarsul – Ecocentros e Ecoparques
- Amarsul – Ecocentros e Ecoparques
- Valorsul - Valorização Trat. Resid. Sólidos Regiões Lisboa
- Urbereciclar - Reciclagem de Resíduos Sólidos Urbanos
- Tratolixo - Tratamento Resíduos Sólidos
- Arte-entulhos-recolha E Transporte De Resíduos Sólidos Lda, Bobadela
- Resotrans-recolha e Transporte de Resíduos Sólidos, Lda
- Recipolymers, Reciclagem de Polimeros, S.A.; Arranhô
- Multicaixa - Equipamentos e Consumíveis de Embalagem, Lda, São Domingos de Rana
- Globespan-Indústria De Cartão, S.A., Linda a Pastora
- Lamina-Industria Transformadora de Materiais de Embalagem Lda., Bobadela
- Empresa Gráfica Funchalense,Sintra
- Loja Solidária Partilha Constante - Campo de Ourique Benfica,Odivelas, Oeiras e Mem Martins
- Móveis Usados E Restaurados,
- AMBIGROUP DEMOLIÇÕES, S.A.,Arranhô
- Liftup DEMOLIÇÕES, S.A.,Alverca do Ribatejo
- DOMIPLANA - Terraplanagens E Materiais de Construção, LDA
- Cabrizterras-Transportes e Terraplanagens Lda, Sintra 25km
- Luzipereira - Demolições E Terraplanagens, Lda., Bararena
- Ambigroup- Demolições, Resíduos e Reciclagem, Arranhô,Odivelas e Seixal
- Renascimento, Santo Antão do Tojal
- BIOLOSE, Alverca do Ribatejo
- Tratosucatas - Indústria e Comércio de Sucatas Metálicas, Idas, Beato
- Covelo e Pinto, Lda, Barreiro
- Ecociclo - Ambiente e Energia, S.A., Arrentela -
- Marquesapal-comércio De Paletes e Produtos Recicladso Lda
- Recopal - Recuperação e Comercialização de Paletes, Lda.
- Manjos Rec. Recuperação e Fabrico de Estruturas de Madeira, Lda, Alverca do Ribatejo e Loures
- Tratosucatas - Indústria e Comércio de Sucatas Metálicas, Idas, Beato
- Recintra, Ferro-Velho, Beato
- Serthinanques - Serralharia Civil, Unipessoal Lda, São Marcos

<
